# Supplementary material
Source: Research Square preprint supplement (doi:10.21203/rs.3.rs-9469339/v1)
Supplement: Supplementary file 1 [file d8550e80db967335b3806bc6.docx]

# Supplementary Description of Content

4.1 Stone removal strategy The main way to treat kidney stones through ureteroscopy is to use laser energy. The two main technologies of laser lithotripsy are to use high-frequency/low-power lasers to dust the stones, and then spontaneously pass through the remaining stone fragments after the operation, break the stone fragments with high-power/low-frequency lasers, and then usually use a retrieval device to actively remove the fragments.

Usually, most stones cannot be excreted from the double J tube. The main function of the double J tube is to support the ureter and keep the ureter unobstructed. Only a small number of small stones can be excreted through the gap between the double J tube or the double J tube and the inner wall of the ureter.

The diameter of the normal ureter is 2-4mm, and it can reach 4-8mm after expansion. Most people are below 6mm, and the diameter of the double J tube is about 2mm. Therefore, generally speaking, after the double J tube is retained, if the gravel is too large, it is difficult to discharge from the double J tube if it exceeds 4mm. If it is a small gravel of 2-4mm, it can be excreted through the double J tube or through the gap between the double J tube and the inner wall of the ureter.

4.2 Soft Mirror Parameters

1.1 Use of electronic imaging technology.

1.2 Imaging resolution ≥ 5lp / mm

1.3 Field of view ≥ 90 °

1.4 Angle of view 0 ° (direct vision)

1.5 Insert OD ≤ 3.1 mm

1.6 Minimum working hole diameter ≥ 1.2 mm

* 1.7 with a three-way valve, the inlet has a rotatable function

1.8 Flexible working tube with a bidirectional bending angle of the front end of the working tube greater than or equal to 270 °

* 1.9 With a fiber-optic fixed lock to ensure safety during surgery

* 1.10 The product also has FDA, CE, and CFDA certifications and is a national registration certificate.

* 1.11 The handle and handle connectors are in the same aseptic package and do not require additional disinfection or use of aseptic protective bags.

* 1.12 The product can be connected to two kinds of hosts, one with its own display and the other as an adapter, which can be developed by an external medical display.

4.3 Pain grading

The World Health Organization (WHO) classifies pain into:

O degree: no pain;

I degree: mild pain, intermittent pain, cannot be used;

II degree: moderate pain, in order to continue, pain affects rest, need to use painkillers

III degree: severe pain, for which persistent pain, no medication can relieve the pain

IV degree: severe pain, for continuous pain with blood pressure, pulse, and other changes.

4.4 Excluding stones in the lower renal calyx

The infrarenal calyces are substantially more angled toward the ureter as compared to the middle and upper calyces, and this causes additional difficulty for soft microscopic lithotripsy at IPA angles higher than thirty degrees. The postoperative impact is substantially distinct from that of middle and upper calyceal stones. As a result, prior to surgery in this trial, individuals with infrarenal calyceal calculi were eliminated from the study using plain CT and enhanced CT.

4.5 High stone removal rate, stones approaching 20 millimeters, short surgical time for stones

The effectiveness of laser lithotripsy has greatly increased as a result of equipment upgrades. Due to the fact that all of the individuals involved in this study were senior and experienced surgeons, their surgeries consumed less time overall in comparison to those of the less experienced surgeons. After lithotripsy, all patients were treated with a stone-setting mesh basket for stone removal, and the postoperative stone removal rate was high because virtually no large stones (less than 4 mm in diameter) were still present in the kidney.

4.6 Patients without double J tubes have a high implantation rate of the sheath in the large ureteral pathway

According to prior studies, there is approximately a 90% success rate for the installation of flexible ureteral sheaths without requiring the use of ureteral stenting tubes. In this study, dilatation is carried out in the presence of minor ureteral strictures by employing lithotripsy forceps, flexible ureteral sheath cores, and ureteral balloons, followed by a one-stage surgery, with an approximate 96% success rate for flexible sheath placement.

4.7 About the Laser Used for Stone Removal

Flexible ureteroscope was inserted through sheath, and 200 μm holmium laser fiber was inserted into the ureteroscope. The lithotripsy energy was adjusted according to the size and hardness of the stone. The energy was 1.5 ~ 2.5 J, and the pulse frequency was 5 ~ 8 Hz.

4.8 Irrigation rinse after stone removal

Normally, most stones cannot pass through the double J tube, whose main function is to support the ureter and keep it open. Only a small number of stones of relatively small volume can be excreted through the double J tube or the gap between the double J tube and the lining of the ureter.

The normal ureter diameter is 2-4mm, after expansion can be 4-8mm, the vast majority of people are below 6mm, the diameter of the double J tube is about 2mm, so generally speaking, after indwelling double J tube, if the gravel is too large, more than 4mm is difficult to discharge from the double J tube. If it is a small lithotripsy of 2-4mm, it is possible to excrete through the double J duct, or through the gap between the double J tube and the inner wall of the ureter.
